# Supplementary material
Source: PubMed Central journal article supplement (PMC4884529)
Supplement: NIHMS776589-supplement.pdf [file NIHMS776589-supplement.pdf]

**SUPPLEMENTARY MATERIALS**

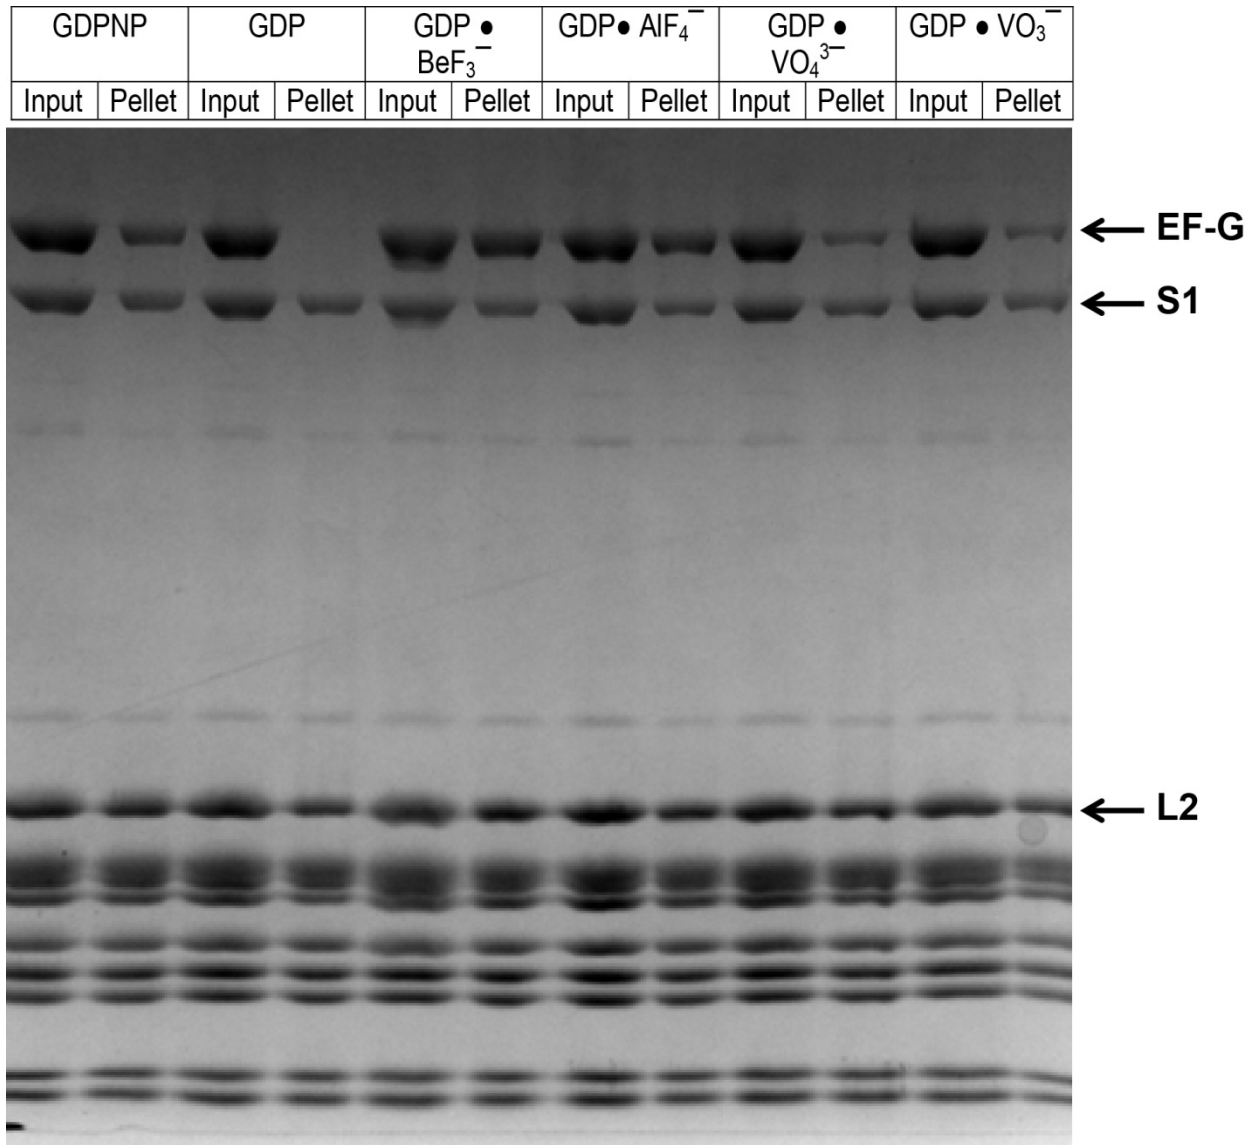

**SUPPLEMENTARY FIGURE 1.** Binding of EF-G to vacant ribosomes in the presence of various nucleotides and phosphate analogues (as indicated) measured by the pelleting assay. EF-G was incubated with vacant ribosomes. Half of each sample was pelleted through a sucrose cushion (pellet); the other half was used as a loading control (input). Protein content of ribosome pellets was analyzed using SDS-PAGE. The band corresponding to EF-G, the largest ribosomal proteins S1 and L2 are indicated by arrows. The cropped version of this gel is shown in Fig.1.

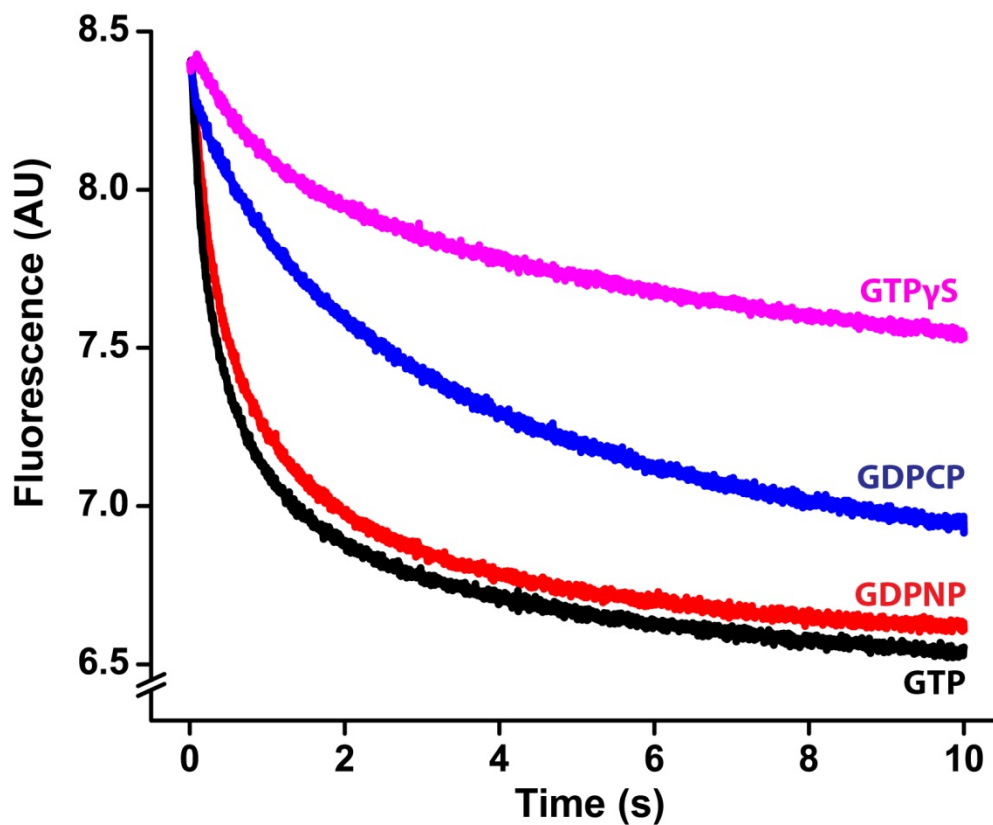

**SUPPLEMENTARY FIGURE 2.** Pre-steady-state kinetics of translocation in the presence of synthetic analogues of GTP. mRNA translocation was induced by mixing pretranslocation ribosomes (35 nM after mixing) with EF-G (1  $\mu$ M after mixing) preincubated with 0.5 mM GTP (black), GDPNP (red), GDPCP (blue) or GTP $\gamma$ S (magenta). Experiments were performed in polyamine buffer at pH 7.5. mRNA translocation was detected by the quenching of fluorescein attached to the 3' end of mRNA using a stopped-flow apparatus.

**SUPPLEMENTARY TABLE 1. Rates of mRNA translocation catalyzed by EF-G in the presence of GDPCP and GTP $\gamma$ S.**

| <b>Nucleotide</b> | $k_1, s^{-1}$  | $k_2, s^{-1}$    | $A_1/(A_1+A_2)$ | $k_{av}, s^{-1}$ |
|-------------------|----------------|------------------|-----------------|------------------|
| GDPCP             | 0.8 $\pm$ 0.04 | 0.16 $\pm$ 0.004 | 0.37 $\pm$ 0.02 | 0.39 $\pm$ 0.03  |
| GTP $\gamma$ S    | 1.0 $\pm$ 0.03 | 0.10 $\pm$ 0.004 | 0.35 $\pm$ 0.01 | 0.41 $\pm$ 0.01  |

Rates of translocation induced by EF-G in the presence of GDPCP or GTP $\gamma$ S were measured in pre-steady-state stopped-flow kinetic experiments in polyamine buffer at pH 7.5. EF-G and ribosome concentrations after mixing were 1  $\mu$ M and 35 nM, respectively.  $k_1$  and  $k_2$  are the rate constants of double-exponential fits of the mRNA translocation data;  $A_1/(A_1+A_2)$  is the relative contribution of the faster phase to the total amplitude of fluorescein quenching. Weighted average values ( $k_{av}$ ) for mRNA translocation rates were calculated by combining the rate constants derived from the two-exponential fits:  $k_{av} = (k_1A_1 + k_2A_2)/(A_1 + A_2)$ .

**SUPPLEMENTARY TABLE 2. Rates of translocation induced by EF-G in the presence of GTP or GDP $\cdot$ BeF $_3^-$  determined by fitting pre-steady-state stopped-flow kinetic data to stretched exponential function (Fig. 5).**

| <b>Nucleotide</b>               | $k_{stretched}, s^{-1}$ | $\beta$         |
|---------------------------------|-------------------------|-----------------|
| GTP, pH 7.5                     | 1.5 $\pm$ 0.2           | 0.56 $\pm$ 0.02 |
| GDP $\cdot$ BeF $_3^-$ , pH 7.5 | 1.2 $\pm$ 0.5           | 0.60 $\pm$ 0.06 |

Fluorescein quenching in kinetic translocation assay was fit to the stretched exponential function  $y=y_0 + A*\exp(-k_{stretched}*t)^\beta$  where  $k_{stretched}$  is stretched exponential rate constant;  $\beta$  is a stretched exponential numerical factor ( $0<\beta\leq 1$ ).
